# Supplementary material for: The application of a photochromic probe to monitor the self-assembly of thermosensitive block copolymers
Source: Royal Society of Chemistry journal article supplement (doi:10.1039/c0sm00746c), 2011-01-01
Supplement: c0sm00746c.pdf [file c0sm00746c.pdf]

## Supporting Information

### The Application of a Photochromic Probe to Monitor the Self-Assembly of Thermosensitive Block Copolymers.

Francesca Ercole, Simon Harrisson, Thomas P. Davis and Richard A. Evans

#### (1) Synthesis of RAFT Agents and SOX derivatives

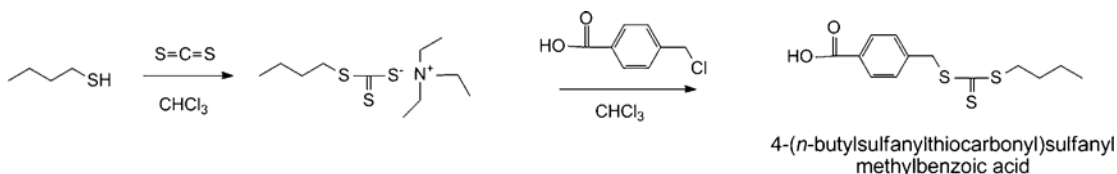

**4-(*n*-Butylsulfanylthiocarbonyl)sulfanyl methylbenzoic acid, RAFT agent.** To a stirring solution of 1,4 butanethiol (0.035 mol, 3.40 g), carbon disulfide (0.070 mol, 5.30 g) in chloroform (50 mL) was added triethylamine (0.116 mol, 11.74 g) dropwise. The solution became yellow and then orange on formation of triethylammonium trithiocarbonate salt. The solution was left to stir at room temperature for 2 hours and then 4-chloromethyl benzoic acid (0.029 mol, 5 g), also dissolved in chloroform (30 mL) was added dropwise. The solution was left to stir for 16 hours at room temperature. It was then washed 5 × with 0.1 M HCl, the organic layers combined, dried with anhydrous MgSO<sub>4</sub> and filtered. The solvent was then removed under vacuum and the remaining yellow RAFT agent, 4-(*n*-butylsulfanylthiocarbonyl)sulfanyl methylbenzoic acid, was collected by filtration with hexane (7 g, 80%). <sup>1</sup>H NMR (400 MHz, *d*<sub>6</sub>-acetone) δ: 0.92 (t, 3H, *J* 7.3 Hz, CH<sub>3</sub>), 1.39 - 1.49 (m, 2H, CH<sub>2</sub>), 1.66 - 1.73 (m, 2H, CH<sub>2</sub>), 3.44 (t, *J* 7.3 Hz, 2H, SCH<sub>2</sub>), 4.78 (s, 2H, ArCH<sub>2</sub>), 7.55 (d, *J* 8.4 Hz, 2H, ArH), 8.01 (d, *J* 8.4 Hz, 2H, ArH) ppm. <sup>13</sup>C NMR (100 MHz, *d*<sub>6</sub>-acetone) δ: 13.8, 22.6, 30.8, 37.3, 40.9, 130.2, 130.7, 130.7, 142.0, 167.2, 224.5 ppm.

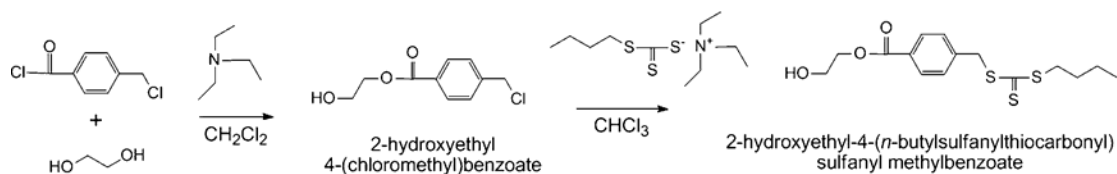

## 2-Hydroxyethyl-4-(*n*-butylsulfanylthiocarbonyl)sulfanyl methyl benzoate, RAFT

**agent.** To an ice-cooled solution of dried ethylene glycol (18.0 g, 0.290 mol) and triethylamine (6.1 mL, 4.43 g, 0.044 mol) in dry dichloromethane (30 mL) was added dropwise, 4-(chloromethyl)benzoyl chloride (5.5 g, 0.029 mol) under argon. The solution was stirred with ice cooling for half an hour and was then left to stir for an additional 12 hours at room temperature. The solution was washed with water 3 × and then brine. The organic layer was dried with anhydrous MgSO<sub>4</sub> and the solvent was evaporated under vacuum to give 2-hydroxyethyl 4-(chloromethyl)benzoate, a thick yellow oil that became a wax on standing (6.41 g). <sup>1</sup>H NMR showed this intermediate product to be of sufficient purity for subsequent use.

The same procedure as described above was followed for the synthesis of the corresponding triethylammonium trithiocarbonate salt in chloroform, using 1,4 butanethiol (0.038 mol, 3.45 g), carbon disulfide (0.071 mol, 5.36 g) and triethylamine (8.91 g, 0.088 mol). 2-Hydroxyethyl 4-(chloromethyl)benzoate (0.029 mol, 6.31 g), dissolved in chloroform was then added dropwise and the solution left to stir at room temperature for 16 hours. The chloroform was removed under vacuum and the residue dissolved in diethyl ether. It was then washed with water and dried with anhydrous MgSO<sub>4</sub>. The solvent was then removed under vacuum and the remaining yellow oil was purified by column chromatography (silica gel, diethyl ether/hexane, 3:1) to give the RAFT agent, 2-hydroxyethyl-4-(*n*-butylsulfanylthiocarbonyl)sulfanyl methylbenzoate, as a waxy yellow solid (3.3 g, 30%). <sup>1</sup>H NMR (400 MHz, CDCl<sub>3</sub>) δ: 0.94 (t, 3H, *J* 7.3 Hz, CH<sub>3</sub>), 1.39 - 1.49 (m, 2H, CH<sub>2</sub>), 1.66 - 1.73 (m, 2H, CH<sub>2</sub>), 3.39 (t, *J* 7.3 Hz, 2H, SCH<sub>2</sub>), 4.67 (s, 2H, ArCH<sub>2</sub>), 7.45 (d, *J* 7.7 Hz, 2H, ArH), 8.05 (d, *J* 7.3 Hz, 2H, ArH) ppm. <sup>13</sup>C NMR (100 MHz, *d*<sub>6</sub>-acetone) δ: 14.8, 23.6, 38.3; 41.8, 31.8, 61.7, 68.5, 131.2, 131.5, 131.6, 143.1, 167.4, 225.5 ppm.

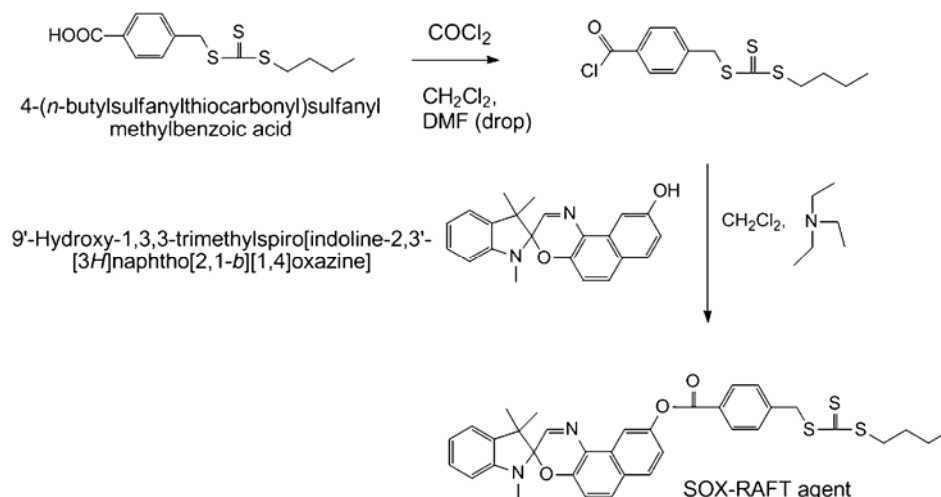

**9'-(4-((*n*-Butylsulfanylthiocarbonyl)sulfanyl)methylbenzoyl)-1,3,3-trimethylspiro[indoline-2,3'-[3H]naphtho[2,1-*b*][1,4]oxazine], SOX-RAFT agent.**

4-(*n*-butylsulfanylthiocarbonyl)sulfanyl methylbenzoic acid (2.0 g, *ca.* 6.66 mmol) was dissolved in dry CH<sub>2</sub>Cl<sub>2</sub> (100 mL) under nitrogen and 1 small drop DMF added. To the mixture was added oxalyl chloride (1.52 g, 1.03 mL, 11.98 mmol) using a gas-tight syringe. The mixture was stirred at ambient temperature for 3 hours. The solvent and excess reagents were removed under vacuum with residual traces of oxalyl chloride removed with the aid of 1,2-dichloroethane. Analysis by <sup>1</sup>H NMR showed quantitative conversion to the corresponding 4-(*n*-butylsulfanylthiocarbonyl)sulfanylmethylbenzoyl chloride. <sup>1</sup>H NMR (400 MHz, *d*<sub>6</sub>-acetone) δ: 0.92 (t, 3H, *J* 7.3 Hz, CH<sub>3</sub>), 1.38 - 1.47 (m, 2H, CH<sub>2</sub>), 1.65 - 1.72 (m, 2H, CH<sub>2</sub>), 3.42 (t, *J* 7.3 Hz, 2H, SCH<sub>2</sub>), 4.82 (s, 2H, ArCH<sub>2</sub>), 7.66 (d, *J* 8.42 Hz, 2H, ArH), 8.09 (d, *J* 8.42 Hz, 2H, ArH) ppm. <sup>13</sup>C NMR (100 MHz, *d*<sub>6</sub>-acetone) δ: 13.8, 22.6, 30.8, 37.5, 40.4, 130.9, 132.4, 132.8, 145.8, 168.1, 224.2 ppm.

To an ice-cooled solution of 9'-hydroxy-1,3,3-trimethylspiro[indoline-2,3'-[3H]naphtho[2,1-*b*][1,4]oxazine] (see Kakishita et al. *J. Heterocyclic Chem.* 1992, 29, 1709) (2.09 g, 6.05 mmol) and triethylamine (1.35 g, 1.86 mL, 13.32 mmol) in dry CH<sub>2</sub>Cl<sub>2</sub> (100 mL), was added dropwise the full quantity of 4-(*n*-butylsulfanylthiocarbonyl)sulfanylmethylbenzoyl chloride in dry CH<sub>2</sub>Cl<sub>2</sub> (35 mL). The mixture was left to stir at room temperature overnight. The solvent was then removed

under vacuum and the residue purified by column chromatography (silica gel, diethyl ether/hexane, 3:2) to give the title compound as mustard coloured solid (3.5 g, 92%).

$^1\text{H}$  NMR (400 MHz,  $d_6$ -acetone)  $\delta$ : 0.94 (t, 3H,  $J$  7.3 Hz,  $\text{CH}_3$ ), 1.35 (2  $\times$  overlapping s, 6H, 2  $\times$   $\text{CH}_3$ ), 1.41 - 1.50 (m, 2H,  $\text{CH}_2$ ), 1.67 - 1.73 (m, 2H,  $\text{CH}_2$ ), 2.78 (s, 3H, N- $\text{CH}_3$ ), 3.46 (t,  $J$  7.3 Hz, 2H,  $\text{SCH}_2$ ), 4.85 (s, 2H,  $\text{ArCH}_2$ ), 6.66 (d,  $J$  8.4 Hz, 1H,  $\text{ArH}$ ), 6.88 (t,  $J$  7.3 Hz, 1H,  $\text{ArH}$ ), 7.07 (d, 9.2 Hz, 1H,  $\text{ArH}$ ), 7.15 - 7.21 (m, 2H,  $\text{ArH}$ ), 7.37 (dd,  $J$  2.6, 9.2 Hz, 1H,  $\text{ArH}$ ), 7.68 (d,  $J$  8.1 Hz, 2H,  $\text{ArH}$ ), 7.83 - 7.87 (m, 2H,  $\text{ArH}$ ), 7.95 (d,  $J$  8.78 Hz, 1H,  $\text{ArH}$ ), 8.22 (d,  $J$  8.42 Hz, 2H,  $\text{ArH}$ ), 8.40 (app d,  $J$  2.2 Hz, 1H,  $\text{ArH}$ ) ppm.  $^{13}\text{C}$  NMR (100 MHz,  $\text{C}_6\text{D}_6$ )  $\delta$ : 13.6, 20.7, 22.2, 25.2, 29.4, 30.2, 37.0, 40.8, 51.8, 99.1, 107.5, 113.9, 116.6, 120.1, 120.3, 121.6, 123.7, 129.5, 129.6, 129.6, 129.7, 130.3, 130.3, 130.8, 132.7, 136.2, 141.5, 145.1, 148.0, 150.8, 150.9, 164.8, 223.3 ppm.

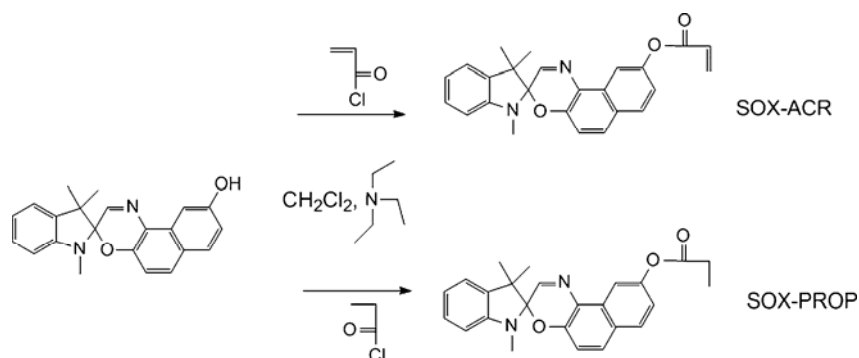

**9'-Acryloyloxy-1,3,3-trimethylspiro[indoline-2,3'-[3H]naphtho[2,1-b][1,4]oxazine],**

(SOX-ACR). The title compound was synthesized as SOX-RAFT agent above, however using 9'-hydroxy-1,3,3-trimethylspiro[indoline-2,3'-[3H]naphtho[2,1-b][1,4]oxazine] (1.51 g, 4.38 mmol), acryloyl chloride (0.44 g, 4.83 mmol) and triethylamine (0.67 g, 6.57 mmol) in dry  $\text{CH}_2\text{Cl}_2$  (40 mL). The reaction mixture was stirred for 2 hours in total and the product obtained as a pale cream solid (1.60 g, 92%) after purification by column chromatography (silica gel,  $\text{CH}_2\text{Cl}_2$ ).  $^1\text{H}$  NMR (400 MHz,  $d_6$ -acetone)  $\delta$ : 1.34 (s, 3H,  $\text{CH}_3$ ), 1.36 (s, 3H,  $\text{CH}_3$ ), 2.78 (s, 3H, N- $\text{CH}_3$ ), 6.14 (dd,  $J$  10.55 Hz,  $J$  1.46 Hz, 1H, =CH), 6.46 (dd,  $J$  17.20 Hz,  $J$  10.25 Hz, 1H, =CH), 6.60 - 6.67 (m, 2H, =CH and  $\text{ArH}$ ), 6.85 - 6.89 (m, 1H,  $\text{ArH}$ ), 7.05 (d,  $J$  8.78 Hz, 1H,  $\text{ArH}$ ), 7.14 - 7.21 (m, 2H,  $\text{ArH}$ ), 7.25 (dd,  $J$  2.6,  $J$  8.78 Hz, 1H,  $\text{ArH}$ ), 7.82 - 7.84 (m, 2H,  $\text{ArH}$ ), 7.90 (d,  $J$  8.78 Hz, 1H,  $\text{ArH}$ ), 8.29 (d,  $J$  2.60 Hz, 1H,  $\text{ArH}$ ) ppm.  $^{13}\text{C}$  NMR

(100 MHz,  $d_6$ -acetone)  $\delta$ : 21.9; 26.7; 30.7; 53.5; 100.7; 109.0; 114.5; 118.3; 123.2; 121.6; 121.3; 124.8; 129.2; 129.9; 129.7; 131.9; 131.3; 134.1; 133.6; 137.7; 146.6; 149.5; 151.7; 153.1; 166.0 ppm.

**9'-Propionyloxy-1,3,3-trimethylspiro[indoline-2,3'-[3H]naphtho[2,1-*b*][1,4]oxazine], (SOX-PROP).** The title compound was synthesized using the same

procedure as SOX-ACR, however using 9'-hydroxy-1,3,3-trimethylspiro[indoline-2,3'-[3H]naphtho[2,1-*b*][1,4]oxazine] (0.20 g, 0.58 mmol), propionyl chloride (0.054 g, 0.58 mmol) and triethylamine (0.106 g, 1.74 mmol) in dry  $\text{CH}_2\text{Cl}_2$  (5 mL). The reaction mixture was stirred for 30 minutes in total and the product obtained as a pale cream solid (0.20 g, 86%) after purification by column chromatography (silica gel, diethyl ether/hexane, 1:1).  $^1\text{H}$  NMR (400 MHz,  $d_6$ -acetone)  $\delta$ : 1.26 (t,  $J$  7.56 Hz, 3H,  $\text{CH}_3$ ), 1.33 (s, 3H,  $\text{CH}_3$ ), 1.35 (s, 3H,  $\text{CH}_3$ ), 2.70 (q,  $J$  7.55 Hz, 2H,  $\text{CH}_2$ ), 2.76 (s, 3H, N- $\text{CH}_3$ ), 6.65 (d,  $J$  7.72 Hz, 1H, ArH), 6.83 - 6.91 (m, 1H, ArH), 7.03 (d,  $J$  8.87 Hz, 1H, ArH), 7.13 - 7.23 (m, 3H, ArH), 7.77 - 7.89 (m, 3H, ArH), 8.26 (d,  $J$  2.37 Hz, 1H, ArH) ppm.  $^{13}\text{C}$  NMR (100 MHz,  $d_6$ -acetone)  $\delta$ : 9.1, 20.7, 25.5, 27.8, 29.5, 52.3, 99.5, 107.8, 113.4, 116.7, 120.3, 120.4, 122.1, 123.5, 127.9, 128.6, 129.9, 130.7, 132.4, 136.5, 145.4, 148.3, 150.8, 151.8, 173.1 ppm.

**(2) Synthesis of block copolymers, PNIPAM-*block*-PNAM and PBA-*block*-PNAM.**

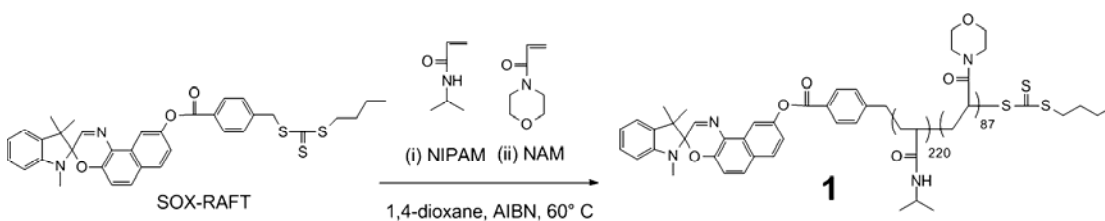

**SOX-(NIPAM)<sub>220</sub>-*b*-(NAM)<sub>87</sub> block copolymer 1.** A solution of *N*-isopropyl acrylamide (NIPAM) (4.92g, 43.5 mmol), AIBN (azobisisobutyronitrile) (1.43mg,  $8.71 \times 10^{-6}$  mol) and SOX-RAFT agent (109 mg, 0.174 mmol) was prepared in 1,4-dioxane (25 mL). The final ratio of monomer to RAFT agent was 250:1 with 0.02 mol% of AIBN with respect to monomer. The mixture was divided between several ampoules which were then degassed with three freeze-pump-thaw cycles, sealed and

then heated at 60 °C in a thermostatted oil bath for up to 16 hours. Conversions were evaluated by <sup>1</sup>H nmr by comparing the integration of the vinyl proton from the monomer at 6.6 ppm to the polymeric and monomer signals at 4 ppm from (CH<sub>3</sub>)<sub>2</sub>CH. The final polymers were purified precipitation into diethyl ether 2 × and vacuum drying till constant weight. Polymerization result for PNIPAM macro RAFT agent: time 16 hours; conversion = 88%; *M<sub>n</sub>* 35,050 g/mol, PDI 1.10 (GPC-DMF); *M<sub>n</sub>* 25,490 g/mol (<sup>1</sup>H NMR estimate); *M<sub>n</sub>* 25,520 g/mol (theoretical *M<sub>n</sub>*).

The macro RAFT agent was used for subsequent block extension with *N*-acryloyl morpholine (NAM): A solution of NAM (0.41 g, 2.88 mmol), the PNIPAM macro RAFT agent (0.80 g, 3.14 × 10<sup>-5</sup> mol), AIBN (0.25 mg, 1.52 × 10<sup>-6</sup> mol) was prepared and transferred to an ampoule using 1,4-dioxane (*ca.* 2.5 mL). The final ratio of monomer to RAFT agent was 92:1 with 0.05 mol% of AIBN with respect to monomer. The ampoule was then degassed with three freeze-pump-thaw cycles, sealed and then heated at 60 °C in a thermostatted oil bath for 16 hours. The final conversion was evaluated gravimetrically on a small sample after removal of monomer and solvent and drying, in a vacuum oven until constant weight. Polymerization result for SOX-(NIPAM)<sub>220</sub>-*b*-(NAM)<sub>87</sub> **1**: time 16 hours; conversion = 90%; *M<sub>n</sub>* 47,470 g/mol, PDI 1.16 (GPC-DMF); *M<sub>n</sub>* 38,360 g/mol (<sup>1</sup>H NMR estimate); *M<sub>n</sub>* 37,800 g/mol (theoretical *M<sub>n</sub>*). GPC plots showing sequential block formation of the copolymer are displayed in section (4).

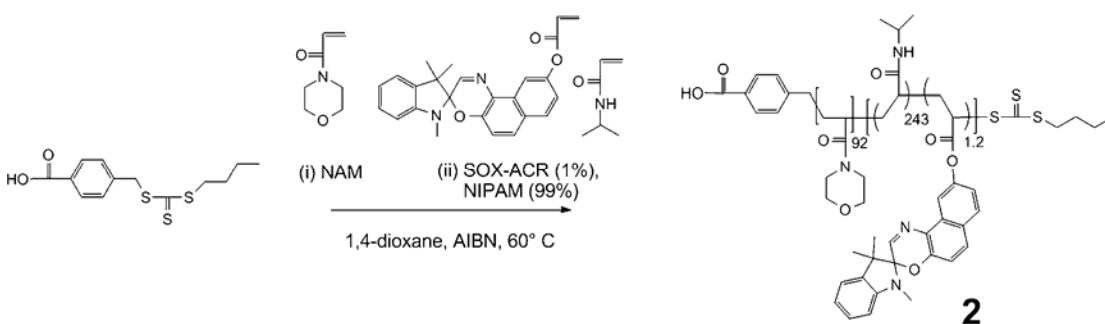

**[(NIPAM)<sub>243</sub>-*co*-(SOX)<sub>1.2</sub>]-*b*-[NAM]<sub>92</sub> block copolymer 2.** A solution of NAM (2.45g, 17.4 mmol), AIBN (2.70 mg, 1.74 × 10<sup>-5</sup> mol) and RAFT agent **5** (55 mg, 0.183 mmol) was completely transferred to an ampoule using 1,4-dioxane (*ca.* 10 mL). The

final ratio of monomer to RAFT agent was 95:1 with 0.1 mol% of AIBN with respect to monomer. The ampoule was then degassed with three freeze-pump-thaw cycles, sealed and then heated at 60 °C in a thermostatted oil bath for 4 hours and 30 minutes. The final conversion was evaluated gravimetrically on a small sample after removal of monomer and solvent and drying, in a vacuum oven until constant weight. For GPC evaluation, a small sample of the polymer was modified by methylation of the carboxylic acid end-group with trimethylsilyldiazomethane, using a procedure reported in literature (Couvreur L. *et al*, *Macromolecules*, 2003, 36 (22), p8261). Polymerization result for PNAM macro RAFT agent: conversion = 95%;  $M_n$  15,600 g/mol, PDI 1.03 (GPC-DMF);  $M_n$  13,300 g/mol ( $^1\text{H}$  NMR estimate);  $M_n$  13,040 g/mol (theoretical  $M_n$ ).

The PNAM macro RAFT agent was used for subsequent block extension with NIPAM and SOX-ACR: A solution of NIPAM (1.45 g, 12.77 mmol), SOX-AC (51.4 mg, 0.129 mmol), the PNAM macro RAFT agent (0.687 g,  $5.17 \times 10^{-5}$  mol) and AIBN (2.12 mg,  $1.29 \times 10^{-5}$  mol) was prepared and transferred to an ampoule using 1,4-dioxane (*ca.* 5 mL). The final ratio of monomers to RAFT agent was 250:1 with 0.1 mol% of AIBN with respect to monomers. The ampoule was then degassed with three freeze-pump-thaw cycles, sealed and then heated at 60 °C in a thermostatted oil bath for 16 hours. The conversions of NIPAM to polymer was evaluated by  $^1\text{H}$  nmr by comparing the integration of the vinyl proton from the monomer at 6.6 ppm to the polymeric and monomer signals at 4 ppm from  $(\text{CH}_3)_2\text{CH}$ . The SOX-ACR appeared to be fully consumed. The final polymers were purified precipitation into diethyl ether 2 × and vacuum drying till constant weight. For GPC evaluation, a small sample of the polymer was modified by methylation as described above. Polymerization result for  $[(\text{NIPAM})_{243}\text{-}co\text{-(SOX)}_{1.2}\text{-}b\text{-[NAM]}_{92}$  **2**: conversion = 95%;  $M_n$  57,790 g/mol, PDI 1.16 (GPC-DMF);  $M_n$  41,300 g/mol ( $^1\text{H}$  NMR estimate);  $M_n$  40,180 g/mol (theoretical  $M_n$ ). GPC plots showing sequential block formation of the copolymer are displayed section (4).

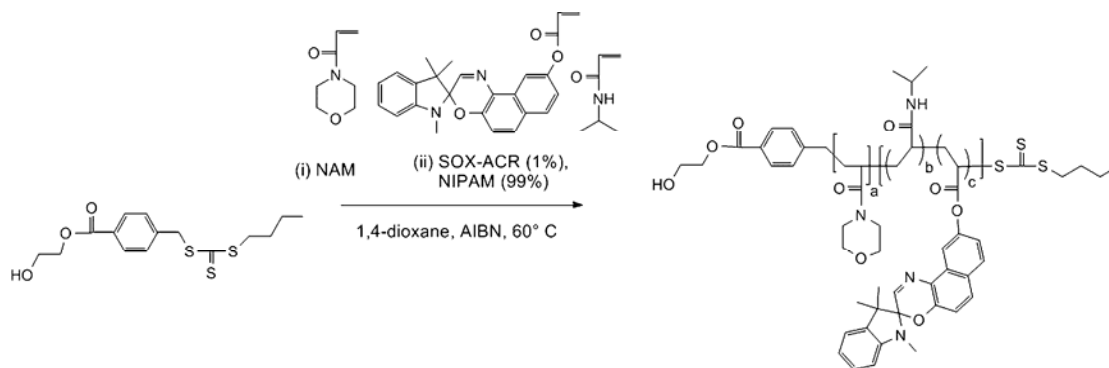

**[(NIPAM)<sub>115-co</sub>-(SOX)<sub>1.3</sub>]-b-[NAM]<sub>93</sub>, 3 and [(NIPAM)<sub>178-co</sub>-(SOX)<sub>1.6</sub>]-b-[NAM]<sub>93</sub>, 4 block copolymers.** A solution of NAM (6.20 g, 43.9 mmol), AIBN (7.14 mg,  $4.35 \times 10^{-5}$  mol) and 2-hydroxyethyl-4-(*n*-butylsulfanylthiocarbonyl)sulfanyl methyl benzoate (158 mg, 0.458 mmol) was completely transferred to an ampoule using 1,4-dioxane (*ca.* 25 mL). The final ratio of monomer to RAFT agent was 96:1 with 0.1 mol% of AIBN with respect to monomer. The ampoule was then degassed with three freeze-pump-thaw cycles, sealed and then heated at 60 °C in a thermostatted oil bath for 3 hours. The final conversion was evaluated gravimetrically on a small sample after removal of monomer and solvent and drying in a vacuum oven until constant weight. Polymerization result for PNAM macro RAFT agent: conversion = 97%;  $M_n$  13,300 g/mol, PDI 1.05 (GPC-DMF);  $M_n$  13,600 g/mol (<sup>1</sup>H NMR estimate);  $M_n$  13,150 g/mol (theoretical  $M_n$ ).

The macro RAFT agent was used for subsequent block extension with NIPAM and SOX-ACR: A solution of NIPAM (2.06 g, 14.59 mmol), SOX-ACR (74.0 mg, 0.129 mmol), the aforementioned PNAM macro RAFT agent (1.05 g,  $7.72 \times 10^{-5}$  mol) and AIBN (3.0 mg,  $1.83 \times 10^{-5}$  mol) was prepared using 1,4-dioxane (*ca.* 8.5 mL) and split into two ampoules. The final ratio of monomers to RAFT agent in each was 250:1 with 0.1 mol% of AIBN with respect to monomers. The ampoules were then degassed with three freeze-pump-thaw cycles, sealed and then heated at 60 °C in a thermostatted oil bath for 50 minutes and 2 hours. The conversions of NIPAM to polymer was evaluated by <sup>1</sup>H nmr by comparing the integration of the vinyl proton from the monomer at 6.6 ppm to the polymeric and monomer signals at 4 ppm from (CH<sub>3</sub>)<sub>2</sub>CH. The SOX-ACR appeared to be fully consumed. The final polymers were purified precipitation into diethyl ether 2 × and vacuum drying until constant weight was achieved.



Polymerization result for [(NIPAM)<sub>115</sub>-*co*-(SOX)<sub>1.3</sub>]-*b*-[NAM]<sub>93</sub>, **3**: time = 50 minutes, conversion = 55%;  $M_n$  27,200 g/mol, PDI 1.16 (GPC-DMF);  $M_n$  26,800 g/mol (<sup>1</sup>H NMR estimate);  $M_n$  29,160 g/mol (theoretical  $M_n$ ).

Polymerization result for [(NIPAM)<sub>178</sub>-*co*-(SOX)<sub>1.6</sub>]-*b*-[NAM]<sub>93</sub>, **4**: time = 2 hours, conversion = 72%;  $M_n$  35,350 g/mol, PDI 1.22 (GPC-DMF);  $M_n$  34,080 g/mol (<sup>1</sup>H NMR estimate);  $M_n$  33,970 g/mol (theoretical  $M_n$ ). GPC plots showing sequential block formation of the copolymers are displayed in section (4).

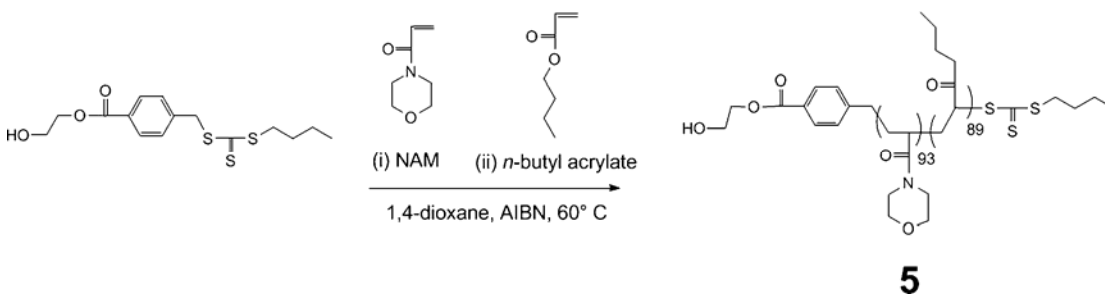

**(*n*-BA)<sub>89</sub>-*b*-(NAM)<sub>93</sub> block copolymer 5.** Block copolymer **5** was synthesised by the extension of the same PNAM macro RAFT agent as used above. A solution of *n*-butyl acrylate (*n*-BA) (1.41 g, 11.0 mmol), the aforementioned PNAM macro RAFT agent (1.0 g,  $7.35 \times 10^{-5}$  mol) and AIBN (1.5 mg,  $9.10 \times 10^{-6}$  mol) was transferred into an ampoule using 1,4-dioxane (*ca.* 2 mL). It was then degassed with three freeze-pump-thaw cycles, sealed and heated at 60 °C in a thermostatted oil bath for 6 hours. The final ratio of monomers to RAFT agent was 150:1 with 0.08 mol% of AIBN with respect to monomer. The conversion was evaluated by <sup>1</sup>H nmr. The resonances integrated to obtain conversions were the vinyl peaks at 5.8, 6.2 and 6.4 ppm (monomer only) and the OCH<sub>2</sub>-peaks at 3.9 - 4.1 ppm (monomer and polymer). The polymer was then purified by evaporation of excess monomer over a gentle stream of N<sub>2</sub>, dissolution of the crude mixtures into CH<sub>2</sub>Cl<sub>2</sub>, precipitation into methanol and decanting the supernatant liquid. Precipitation was carried out 2 × and the polymer was then dried in a vacuum oven for 48 hours. Polymerization result for (*n*-BA)<sub>89</sub>-*b*-(NAM)<sub>93</sub> **5**: conversion = 64%;  $M_n$  21,328 g/mol, PDI 1.20 (GPC-DMF);  $M_n$  24,881 g/mol (<sup>1</sup>H NMR estimate);  $M_n$  25,900 g/mol (theoretical  $M_n$ ). GPC plots showing sequential block formation of the copolymer are displayed in section (4).

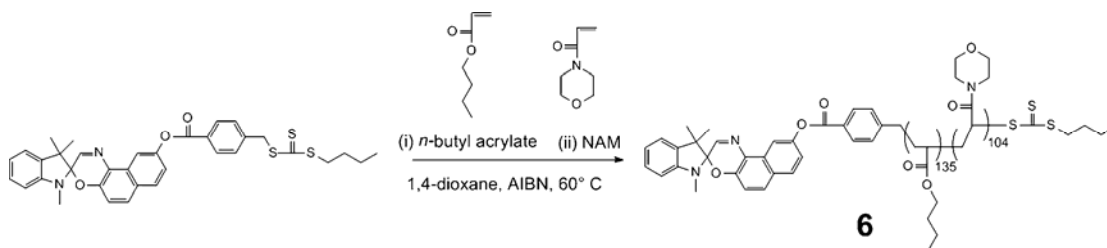

**SOX-(*n*-BA)<sub>135</sub>-*b*-(NAM)<sub>104</sub> block copolymer **6**.** A solution of *n*-BA (7.05 g, 55.0 mmol), AIBN (3mg,  $1.84 \times 10^{-5}$  mol) and SOX-RAFT agent (230 mg, 0.367 mmol) was prepared in benzene (10 mL). The final ratio of monomer to RAFT agent was 150:1 with 0.03 mol% of AIBN with respect to monomer. The mixture was transferred to an ampoule which was then degassed with three freeze-pump-thaw cycles, sealed and then heated at 60 °C in a thermostatted oil bath for 8 hours. The conversion was evaluated by <sup>1</sup>H nmr. The resonances integrated were the vinyl peaks at 5.8, 6.2 and 6.4 ppm (monomer only) and the OCH<sub>2</sub>- peaks at 3.9 - 4.1 ppm (monomer and polymer). The polymer was then purified by evaporation of excess monomer over a gentle stream of N<sub>2</sub>, dissolution of the crude mixtures into CH<sub>2</sub>Cl<sub>2</sub>, precipitation into methanol and decanting the supernatant liquid. Precipitation was carried out 2 × and the polymer then dried in a vacuum oven for 48 hours. Polymerization result for poly(*n*-butyl acrylate), PBA macro RAFT agent: conversion = 84%; *M<sub>n</sub>* 20,430 g/mol, PDI 1.04 (GPC-DMF); *M<sub>n</sub>* 17,980 g/mol (<sup>1</sup>H NMR estimate); *M<sub>n</sub>* 16,790 g/mol (theoretical *M<sub>n</sub>*).

The PBA macro RAFT agent was used for subsequent block extension with NAM: A solution of NAM (1.20g, 8.50 mmol), the aforementioned PBA macro RAFT agent (1.30g,  $7.23 \times 10^{-5}$  mol) and AIBN (0.64 mg,  $3.90 \times 10^{-6}$  mol) was prepared and transferred to an ampoule using 1,4-dioxane (*ca.* 6 mL). The final ratio of monomer to RAFT agent was 118:1 with 0.05 mol% of AIBN with respect to monomer. The ampoule was then degassed with three freeze-pump-thaw cycles, sealed and then heated at 60 °C in a thermostatted oil bath for 16 hours. The polymer was then purified by dissolution of the crude mixtures into CH<sub>2</sub>Cl<sub>2</sub>, precipitation into methanol and decanting the supernatant liquid. Precipitation was carried out 2 × and the polymer was then dried in a vacuum oven for 48 hours. The final conversion was evaluated gravimetrically on a small sample after removal of monomer and solvent and drying, in a vacuum oven until constant

weight. Polymerization result for SOX-(*n*-BA)<sub>135</sub>-*b*-(NAM)<sub>104</sub> block copolymer **6**: conversion = 85%;  $M_n$  35,680 g/mol, PDI 1.06 (GPC-DMF);  $M_n$  32,690 g/mol (<sup>1</sup>H NMR estimate);  $M_n$  32,140 g/mol (theoretical  $M_n$ ). GPC plots showing sequential block formation of the copolymer are displayed in section (4).

### (3) Synthesis of PNAM control polymers:

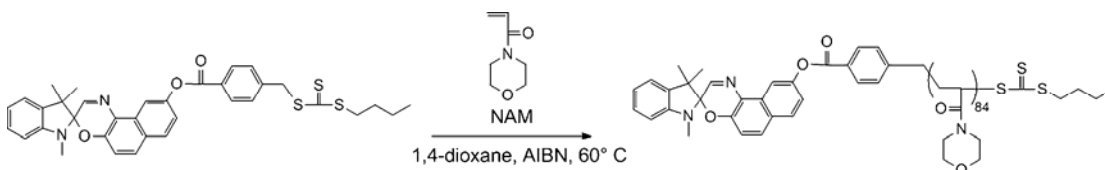

**Control polymer SOX-(NAM)<sub>84</sub>.** A solution of NAM (1.46 g, 10.3 mmol), AIBN (1.4 mg,  $8.84 \times 10^{-6}$  mol) and SOX-RAFT agent (68 mg, 0.109 mmol) was transferred to an ampoule using 1,4-dioxane (*ca.* 5 mL). The final ratio of monomer to RAFT agent was 95:1 with 0.09 mol% of AIBN with respect to monomer. The ampoule was then degassed with three freeze-pump-thaw cycles, sealed and then heated at 60 °C in a thermostatted oil bath for 16 hours. The final conversion was evaluated gravimetrically on a small sample after removal of monomer and solvent and drying, in a vacuum oven until constant weight. Polymerization result for SOX-(NAM)<sub>84</sub>: conversion = 90%;  $M_n$  14,300 g/mol, PDI 1.04 (GPC-DMF);  $M_n$  12,450 (<sup>1</sup>H NMR estimate);  $M_n$  11,360 g/mol (theoretical  $M_n$ ).

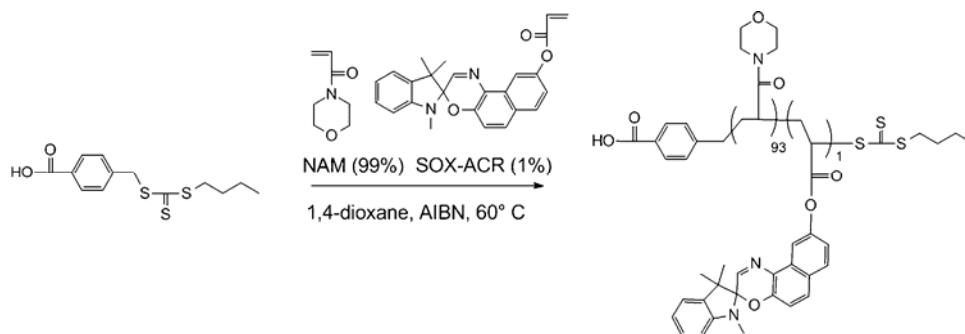

**Control polymer (SOX)<sub>1</sub>-*co*-(NAM)<sub>93</sub>.** A solution of NAM (2.43g, 17.2 mmol), SOX-ACR (69 mg, 0.174 mmol), AIBN (2.90 mg,  $1.74 \times 10^{-5}$  mol) and 4-(*n*-butylsulfanylthiocarbonyl)sulfanyl methylbenzoic acid RAFT agent (55 mg, 0.183

mmol) was transferred to an ampoule using 1,4-dioxane (*ca.* 10 mL). The final ratio of monomers to RAFT agent was 95:1 with 0.1 mol% of AIBN with respect to monomer. The ampoule was then degassed with three freeze-pump-thaw cycles, sealed and then heated at 60 °C in a thermostatted oil bath for 4 hours and 30 minutes. The final conversion was evaluated gravimetrically on a small sample after removal of monomer and solvent and drying, in a vacuum oven until constant weight. For GPC evaluation, a small sample of the polymer was modified by methylation of the carboxylic acid end-group with trimethylsilyldiazomethane, using a procedure reported in literature (Couvreur L. *et al*, *Macromolecules*, 2003, 36 (22), p8261). Polymerization result for (SOX)<sub>1-co</sub>-(NAM)<sub>93</sub> polymer: conversion = 98%;  $M_n$  20,132 g/mol, PDI 1.03 (GPC-DMF);  $M_n$  13,900 g/mol (<sup>1</sup>H NMR estimate);  $M_n$  13,440 g/mol (theoretical  $M_n$ ).

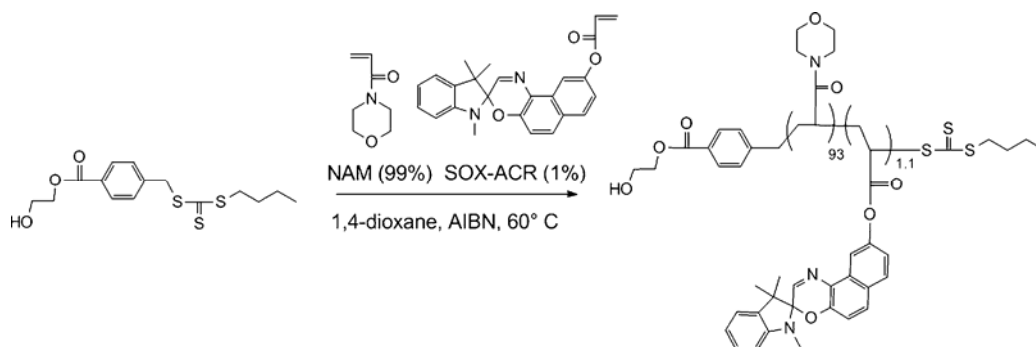

**Control polymer (SOX)<sub>1,1-co</sub>-(NAM)<sub>93</sub>.** A solution of NAM (1.22 g, 8.64 mmol), SOX-ACR (34.7 mg,  $8.71 \times 10^{-5}$  mmol), AIBN (1.43 mg,  $0.871 \times 10^{-5}$  mol) and 2-hydroxyethyl-4-(*n*-butylsulfanylthiocarbonyl)sulfanyl methyl benzoate RAFT agent (32.3 mg,  $9.38 \times 10^{-5}$  mol) was transferred to an ampoule using 1,4-dioxane (*ca.* 5 mL). The final ratio of monomer to RAFT agent was 93:1 with 0.1 mol% of AIBN with respect to monomers. The ampoule was then degassed with three freeze-pump-thaw cycles, sealed and then heated at 60 °C in a thermostatted oil bath for 4 hours. The final conversion was evaluated gravimetrically on a small sample after removal of monomer and solvent and drying, in a vacuum oven until constant weight. Polymerization result for (SOX)<sub>1,1-co</sub>-(NAM)<sub>93</sub>: conversion = 95%;  $M_n$  12,930 g/mol, PDI 1.05 (GPC-DMF);  $M_n$  13,600 g/mol (<sup>1</sup>H NMR estimate);  $M_n$  12,700 g/mol (theoretical  $M_n$ ).

(4) GPC Traces showing block formation for polymers 1-6

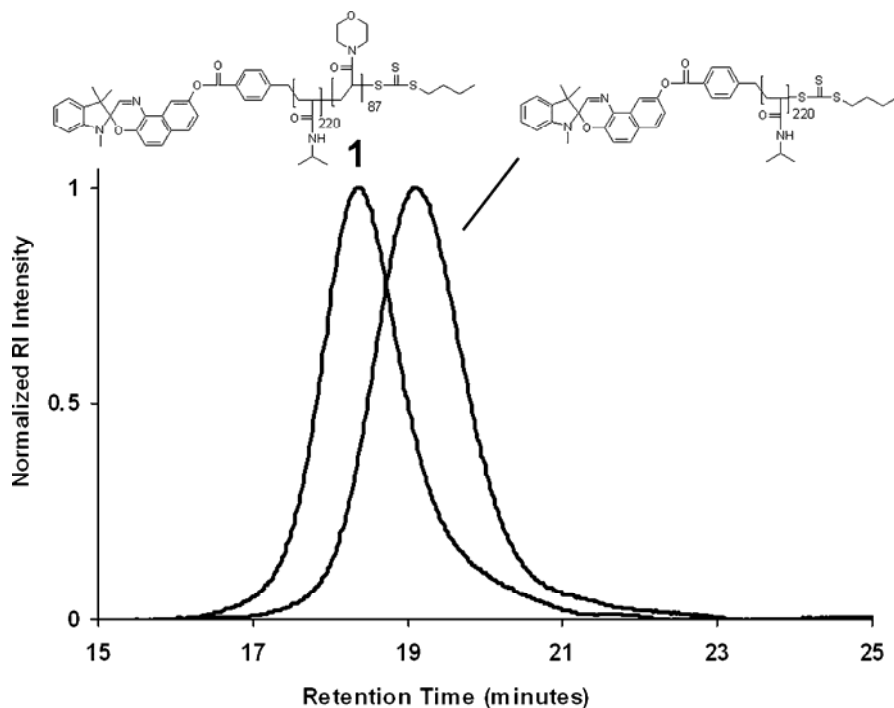

**Figure 1.** Overlaid and normalised GPC traces showing sequential block formation for synthesis of SOX-(NIPAM)<sub>220</sub>-*b*-(NAM)<sub>87</sub> **1**.

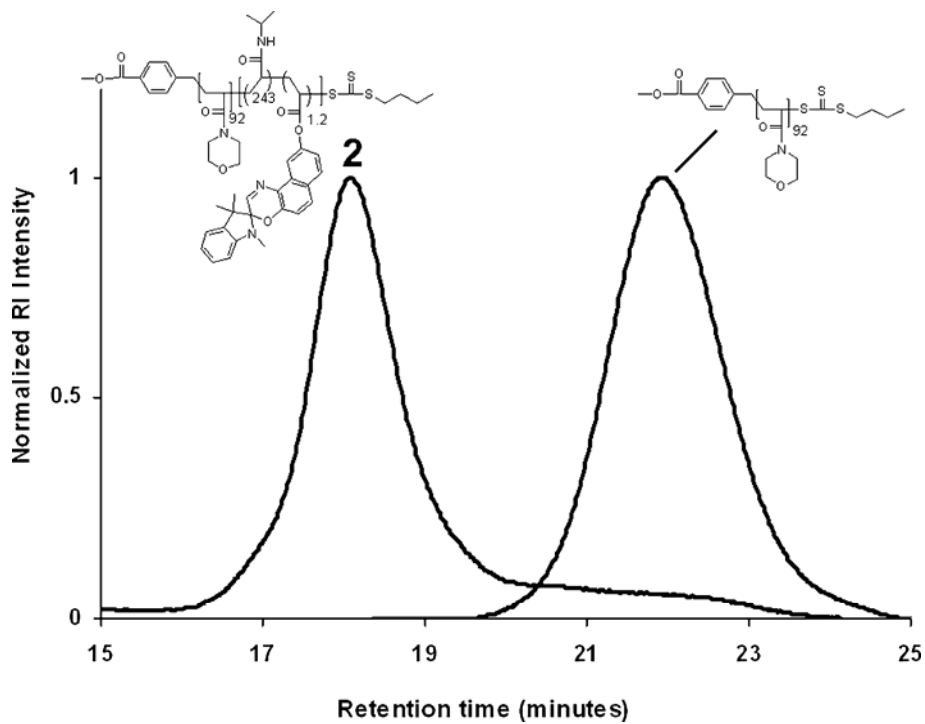

**Figure 2.** Overlaid and normalised GPC traces showing sequential block formation for synthesis of [(NIPAM)<sub>243</sub>-*co*-(SOX)<sub>1.2</sub>]-*b*-[NAM]<sub>92</sub> **2**.

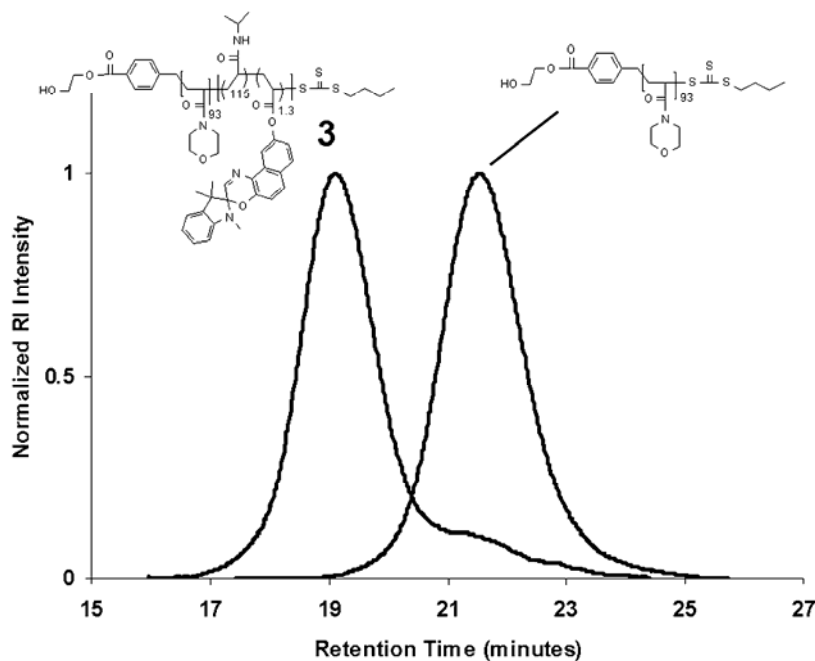

**Figure 3.** Overlaid and normalised GPC traces showing sequential block formation for synthesis of  $[(\text{NIPAM})_{115}\text{-}co\text{-}(\text{SOX})_{1.3}\text{-}b\text{-}[\text{NAM}]_{93}$  **3**.

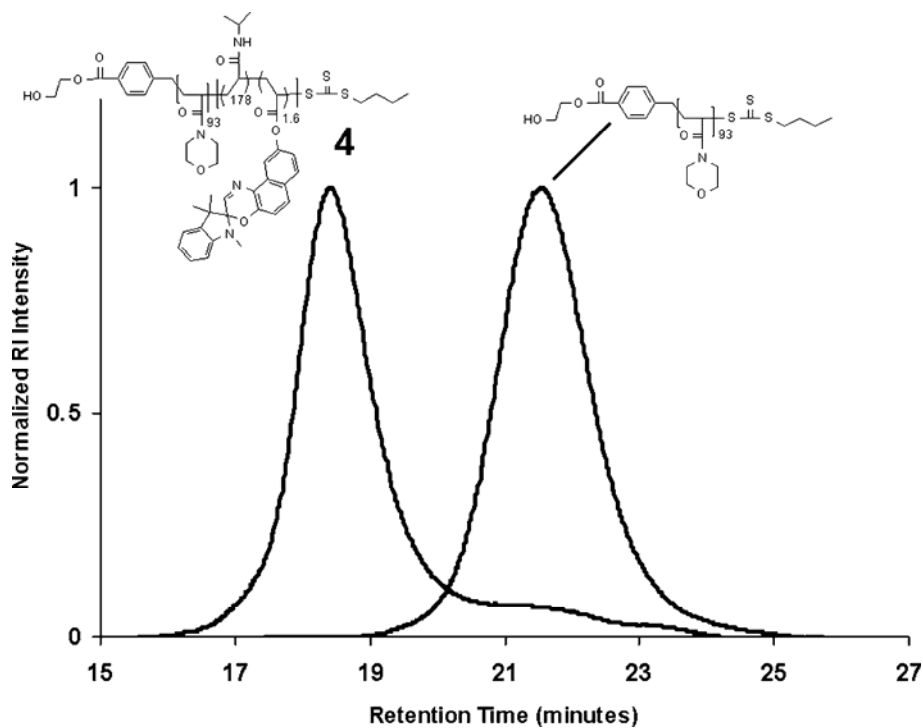

**Figure 4.** Overlaid and normalised GPC traces showing sequential block formation for synthesis of  $[(\text{NIPAM})_{178}\text{-}co\text{-}(\text{SOX})_{1.6}\text{-}b\text{-}[\text{NAM}]_{93}$  **4**.

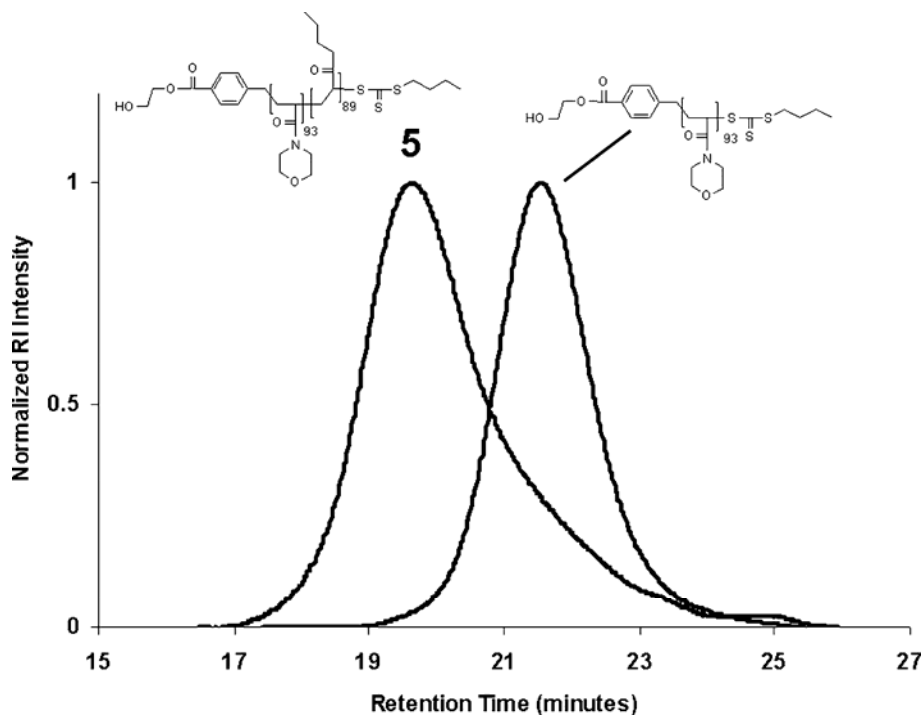

**Figure 5.** Overlaid and normalised GPC traces showing sequential block formation for synthesis of (BA)<sub>89</sub>-*b*-(NAM)<sub>93</sub> **5**.

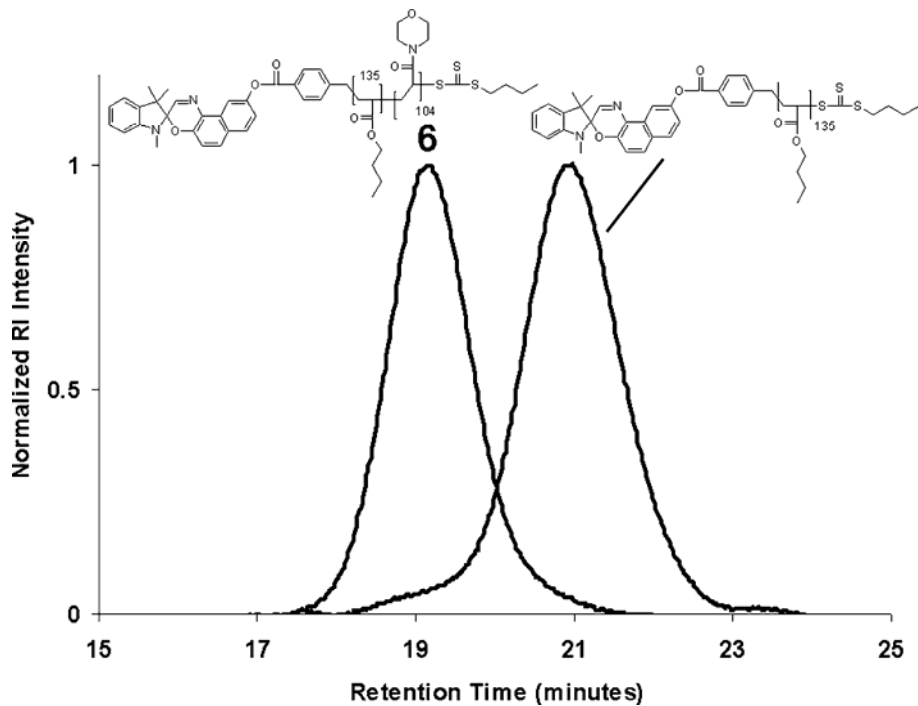

**Figure 6.** Overlaid and normalised GPC traces showing sequential block formation for synthesis of SOX-(BA)<sub>135</sub>-*b*-(NAM)<sub>104</sub> **6**.

(5) Representative  $^1\text{H}$  NMR Spectra of Polymers

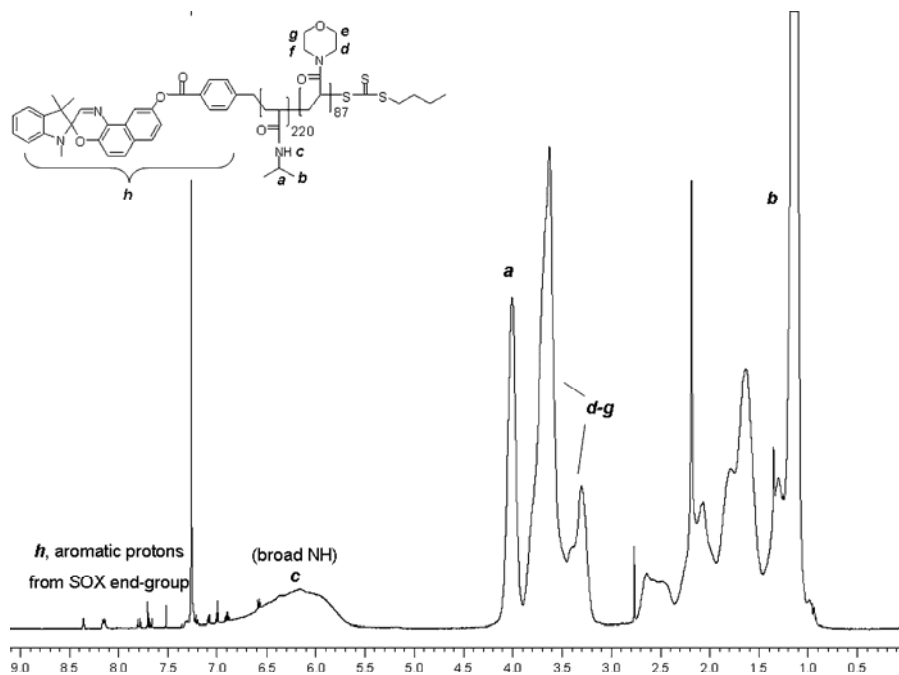

Figure 7.  $^1\text{H}$  NMR (400 MHz,  $\text{CDCl}_3$ ) of  $\text{SOX}-(\text{NIPAM})_{220}\text{-}b\text{-(NAM)}_{87}$  **1**.

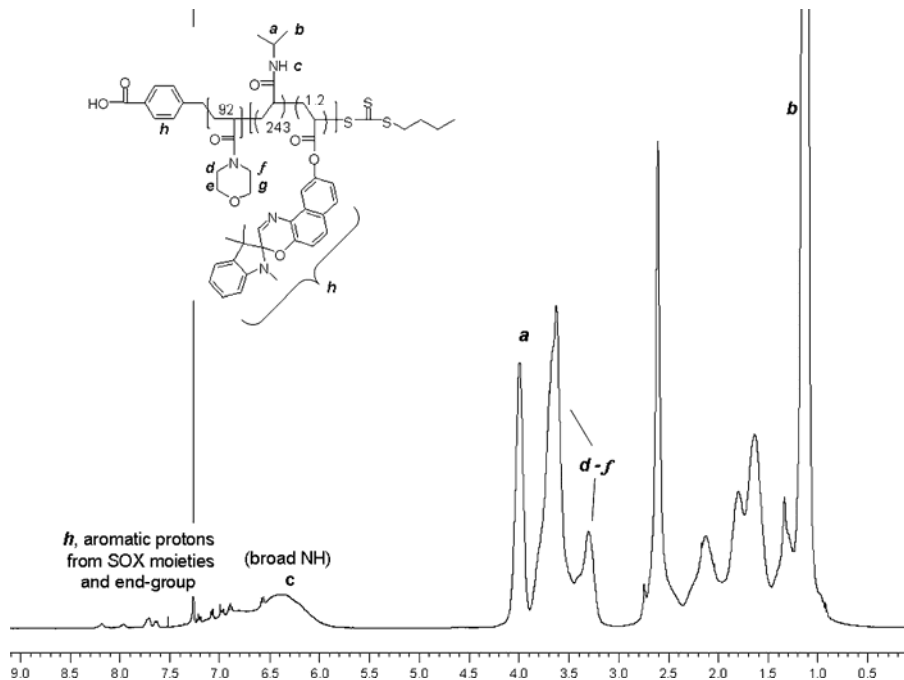

Figure 8.  $^1\text{H}$  NMR (400 MHz,  $\text{CDCl}_3$ ) of  $[(\text{NIPAM})_{243}\text{-}co\text{-(SOX)}_{1.2}]\text{-}b\text{-}[\text{NAM}]_{92}$  **2**.



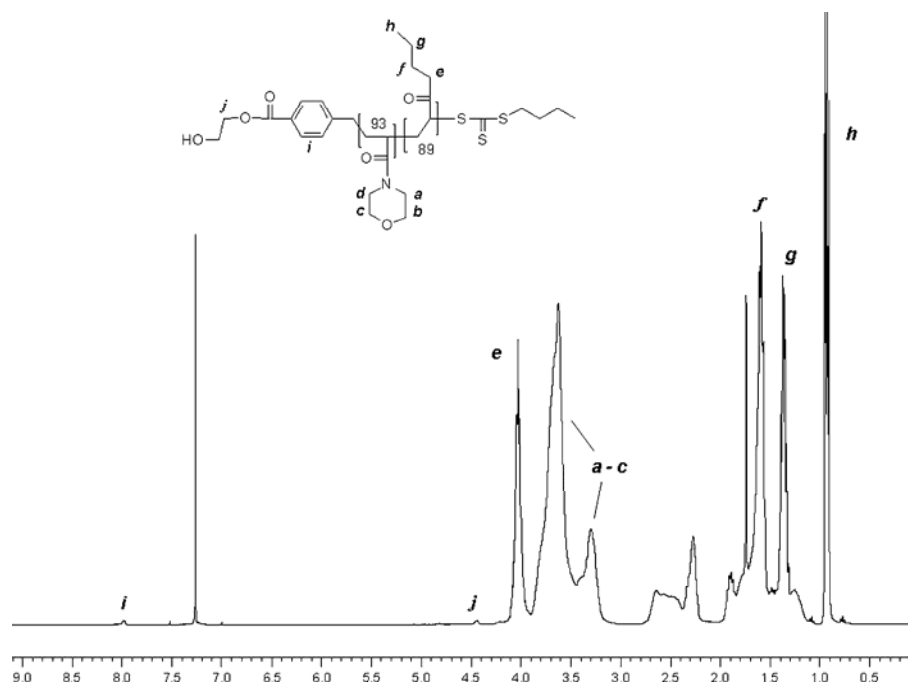

**Figure 9.** <sup>1</sup>H NMR (400 MHz, CDCl<sub>3</sub>) of (BA)<sub>89</sub>-b-(NAM)<sub>93</sub> **5**.

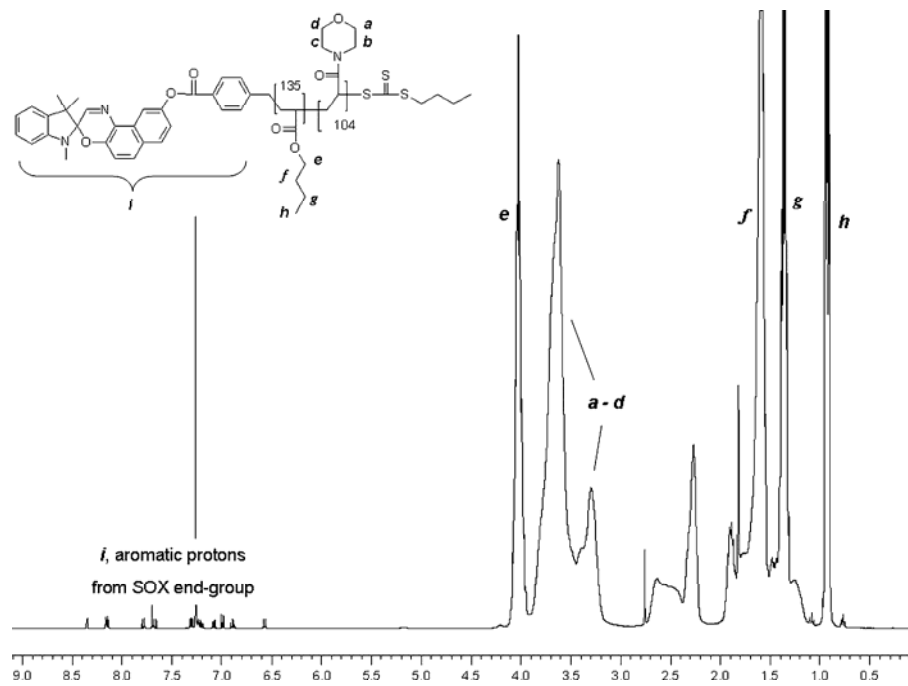

**Figure 10.** <sup>1</sup>H NMR (400 MHz, CDCl<sub>3</sub>) of SOX-(BA)<sub>135</sub>-b-(NAM)<sub>104</sub> **6**.

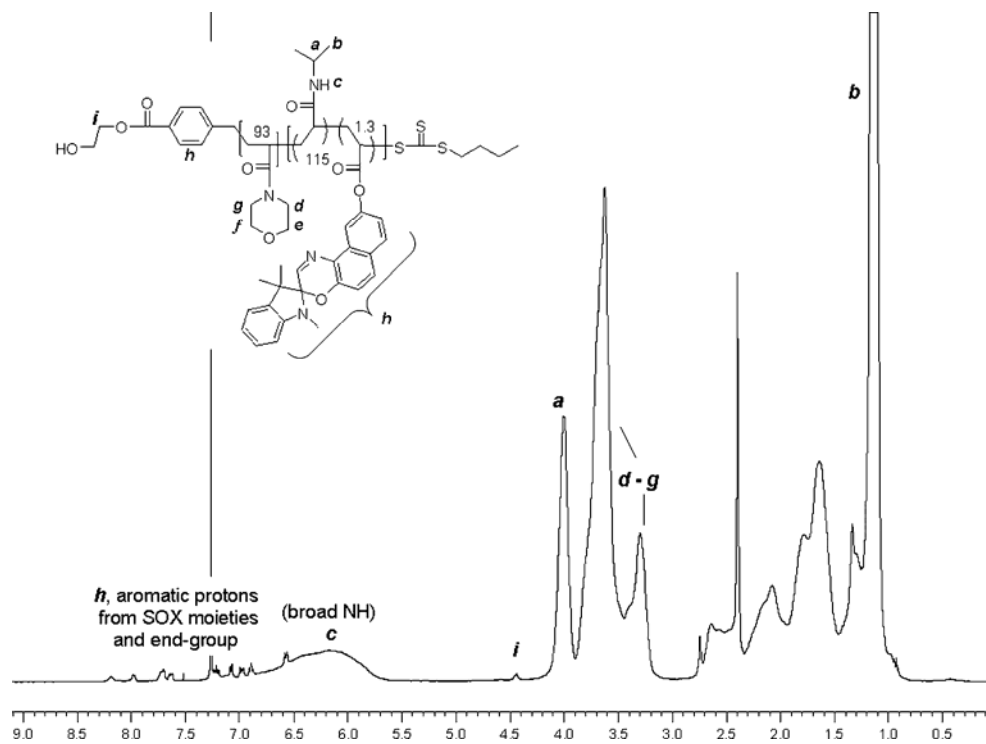

**Figure 11.**  $^1\text{H}$  NMR (400 MHz,  $\text{CDCl}_3$ ) of  $[(\text{NIPAM})_{115}\text{-co-}(\text{SOX})_{1.3}]\text{-b-}[\text{NAM}]_{93}$  **3**.

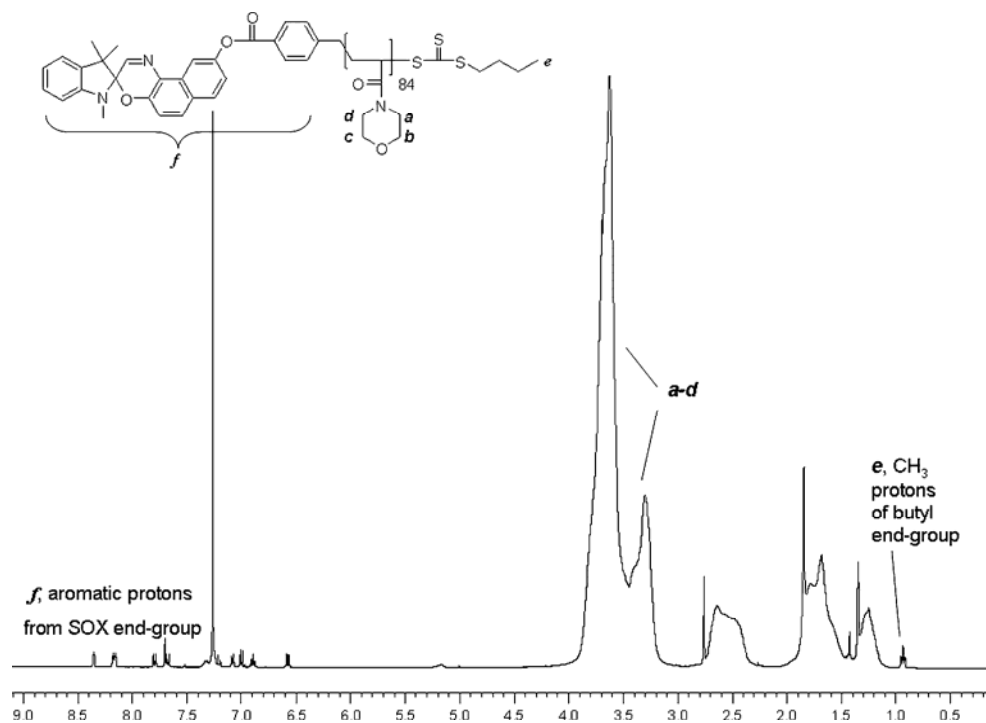

**Figure 12.**  $^1\text{H}$  NMR (400 MHz,  $\text{CDCl}_3$ ) of control polymer,  $\text{SOX-}(\text{NAM})_{84}$ .

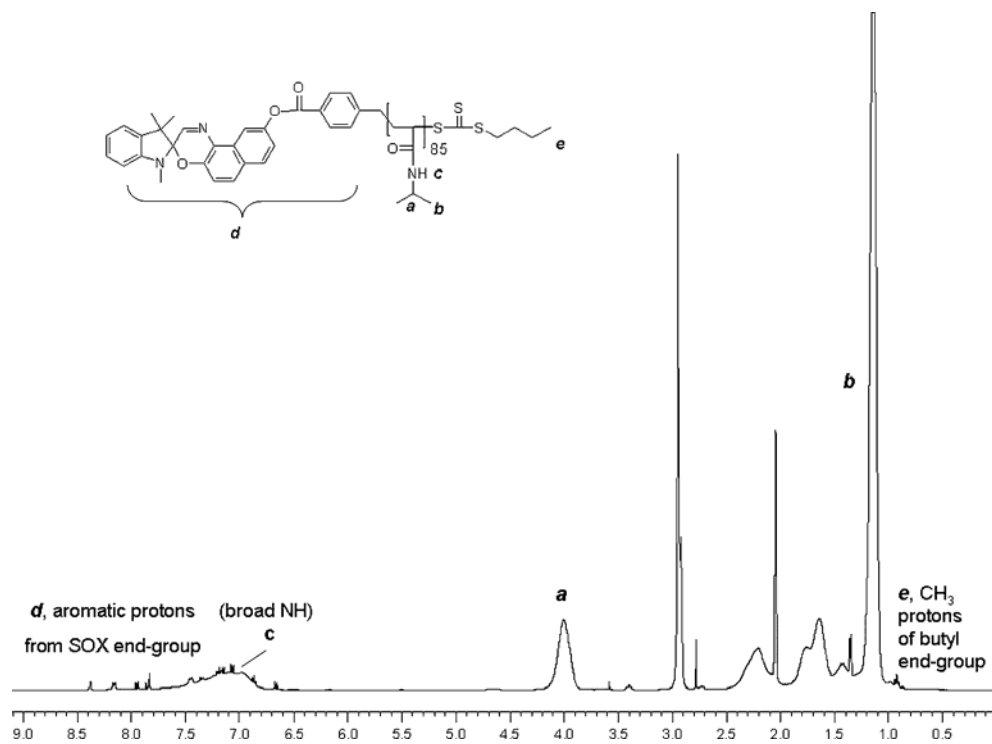

**Figure 13.** <sup>1</sup>H NMR (400 MHz, *d*<sub>6</sub>-acetone) of SOX-PNIPAM (macroRAFT precursor to 1).

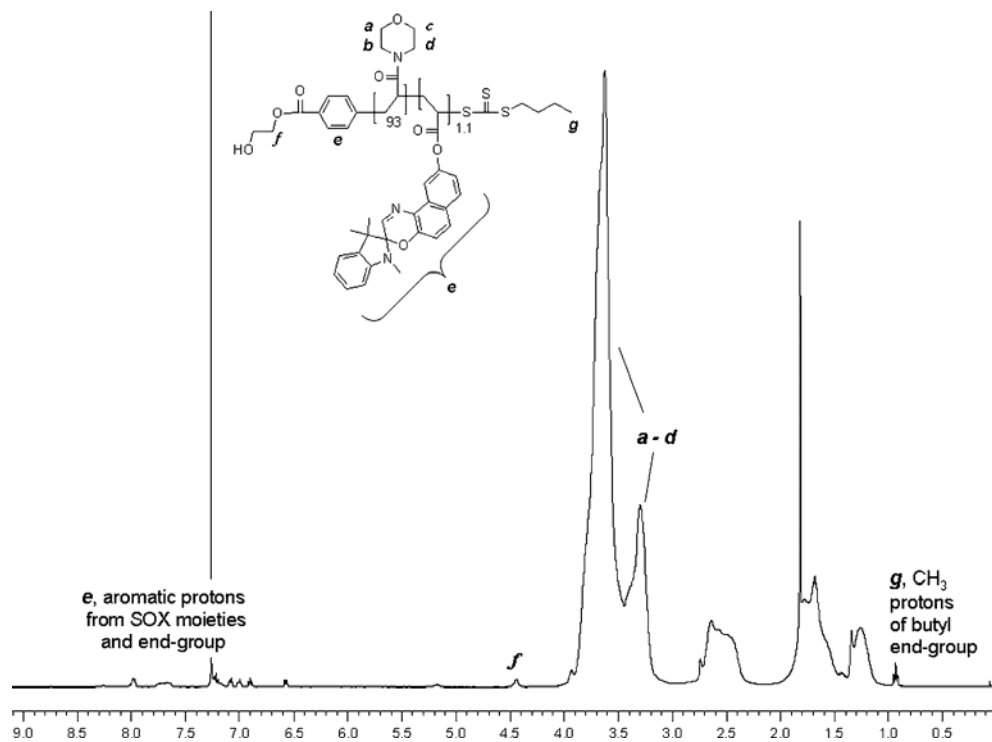

**Figure 14.** <sup>1</sup>H NMR (400 MHz, CDCl<sub>3</sub>) of control polymer (SOX)<sub>1.1</sub>-co-(NAM)<sub>93</sub>.

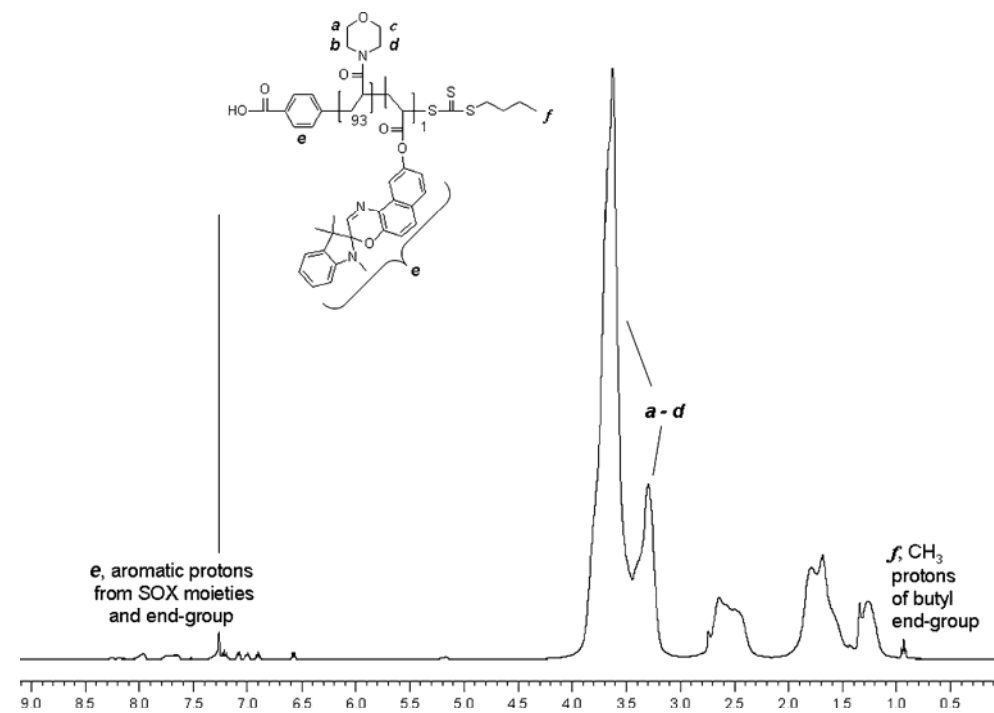

**Figure 15.** <sup>1</sup>H NMR (400 MHz, CDCl<sub>3</sub>) of control polymer (SOX)<sub>1</sub>-co-(NAM)<sub>93</sub>.

## (6) Raw Data for Graphs

**Table 1:** Decolouration kinetics of SOX-(NIPAM)<sub>220</sub>-*b*-(NAM)<sub>87</sub> **1** in water (left) and corresponding DLS measurements (right) *vs* temperature (°C).<sup>a</sup>

| Temp. (°C) | $A_0^b$ | $k_1$ (min <sup>-1</sup> ) | $A_1$  | $k_2$ (min <sup>-1</sup> ) | $A_2$  | Temp. (°C) | $D_h$ (nm)<br>PDI |
|------------|---------|----------------------------|--------|----------------------------|--------|------------|-------------------|
| 20         | 1.68    | 1.2827                     | 1.0276 | 0                          | 0      | 20         | 29.5<br>0.053     |
| 22         | 1.32    | 1.6914                     | 1.0348 | 0                          | 0      | 22         | 29.5<br>0.066     |
| 24         | 1.18    | 2.0510                     | 1.0316 | 0                          | 0      | 24         | 29.5<br>0.067     |
| 26         | 1.00    | 2.4756                     | 1.0223 | 0                          | 0      | 26         | 29.5<br>0.063     |
| 28         | 0.94    | 3.1881                     | 1.0168 | 0                          | 0      | 28         | 30.0<br>0.057     |
| 29         | 0.85    | 3.5694                     | 1.0031 | 0.0955                     | 0.0061 | 30         | 30.8<br>0.078     |
| 30         | 0.75    | 3.9134                     | 1.0068 | 0.2343                     | 0.0070 | 32         | 34.4<br>0.058     |
| 31         | 0.59    | 4.1654                     | 1.0031 | 0.2459                     | 0.0114 | 34         | 47.7<br>0.029     |
| 32         | 0.51    | 4.5874                     | 0.9888 | 0.7949                     | 0.0173 | 35         | 49.4<br>0.014     |
| 33         | 0.53    | 5.0984                     | 0.9906 | 0.7390                     | 0.0194 | 38         | 49.4<br>0.004     |
| 34         | 0.43    | 4.9654                     | 0.9773 | 0.3966                     | 0.0288 |            |                   |
| 36         | 0.42    | 6.3568                     | 1.0129 | 0                          | 0      |            |                   |
| 38         | 0.33    | 8.4718                     | 0.9969 | 1.0428                     | 0.0121 |            |                   |

<sup>a</sup> Refer to above experimental section for description of measurements; for both measurements concentration of polymer in water =  $1.2 \times 10^{-4}$  M (4.8 mg/mL), based on  $M_n$  38,360 g/mol (<sup>1</sup>H NMR estimate).

<sup>b</sup>  $A_0$  refers to measured absorbance intensity at onset of thermal decolouration period

**Table 2:** Decolouration of [(NIPAM)<sub>243-co</sub>-(SOX)<sub>1.2</sub>]-*b*-[NAM]<sub>92</sub> **2** in water (left) and corresponding DLS measurements (right) vs temperature (°C).<sup>a</sup>

| Temp. (°C) | $A_0^b$ | $k_1$ (min <sup>-1</sup> ) | $A_1$  | $k_2$ (min <sup>-1</sup> ) | $A_2$  | Temp. (°C) | $D_h$ (nm)<br>PDI |
|------------|---------|----------------------------|--------|----------------------------|--------|------------|-------------------|
| 20         | 1.37    | 2.8930                     | 0.9648 | 0.9634                     | 0.0435 | 20         | 15.6<br>0.266     |
| 22         | 1.20    | 3.6255                     | 0.9809 | 1.0076                     | 0.0219 | 22         | 15.8<br>0.282     |
| 24         | 1.18    | 4.6339                     | 0.9615 | 1.3115                     | 0.0455 | 25         | 15.9<br>0.275     |
| 26         | 0.96    | 5.9048                     | 0.9416 | 1.7016                     | 0.0602 | 27         | 17.9<br>0.236     |
| 27         | 0.91    | 6.4137                     | 0.9663 | 1.4622                     | 0.0434 | 28         | 21.7<br>0.232     |
| 28         | 0.85    | 6.8381                     | 1.0212 | 0.4800                     | 0.0077 | 29         | 25.5<br>0.208     |
| 29         | 0.83    | 6.6726                     | 1.0175 | 0.3345                     | 0.0066 | 30         | 28.3<br>0.159     |
| 30         | 0.81    | 6.6116                     | 1.0080 | 0.2912                     | 0.0052 | 32         | 30.3<br>0.146     |
| 31         | 0.77    | 6.7862                     | 1.0121 | 0.0212                     | 0.0012 | 35         | 30.1<br>0.140     |
| 32         | 0.70    | 7.2285                     | 0.9936 | 0.7604                     | 0.0069 |            |                   |
| 34         | 0.59    | 9.8620                     | 0.9542 | 4.0762                     | 0.0507 |            |                   |
| 36         | 0.55    | 10.736                     | 1.0222 | 0                          | 0      |            |                   |
| 38         | 0.45    | 13.662                     | 1.0249 | 0                          | 0      |            |                   |

<sup>a</sup> Refer to above experimental section for description of measurements; for both measurements concentration of polymer in water =  $1.0 \times 10^{-4}$  M (4.1 mg/mL), based on  $M_n$  41,300 g/mol (<sup>1</sup>H NMR estimate); refer to figures below for plotted results

<sup>b</sup>  $A_0$  refers to measured absorbance intensity at onset of thermal decolouration period

**Table 3:** Decolouration of [(NIPAM)<sub>115-co</sub>-(SOX)<sub>1.6</sub>]-*b*-[NAM]<sub>93</sub> **3** in water and corresponding DLS measurements (right) *vs* temperature (°C).<sup>a</sup>

| Temp. (°C) | $A_0^b$ | $k_1$ (min <sup>-1</sup> ) | $A_1$  | $k_2$ (min <sup>-1</sup> ) | $A_2$  | Temp. (°C) | $D_h$ (nm)<br>PDI |
|------------|---------|----------------------------|--------|----------------------------|--------|------------|-------------------|
| 20         | 1.80    | 3.4757                     | 0.9596 | 0.6265                     | 0.0454 | 20         | 18.1<br>0.252     |
| 22         | 1.57    | 4.4044                     | 0.9554 | 0.7937                     | 0.0460 | 22         | 18.2<br>0.233     |
| 24         | 1.36    | 5.4194                     | 0.9641 | 0.8513                     | 0.0387 | 24         | 19.1<br>0.226     |
| 26         | 1.16    | 6.7162                     | 0.9734 | 1.1720                     | 0.0394 | 26         | 20.9<br>0.196     |
| 27         | 1.09    | 7.2531                     | 0.9665 | 0.9499                     | 0.0376 | 27         | 22.6<br>0.167     |
| 28         | 1.02    | 7.8480                     | 0.9703 | 1.0941                     | 0.0401 | 28         | 25.2<br>0.127     |
| 29         | 0.95    | 8.1726                     | 0.9742 | 0.7973                     | 0.0289 | 30         | 30.1<br>0.058     |
| 30         | 0.92    | 8.5503                     | 0.9641 | 1.1322                     | 0.0346 | 32         | 33.6<br>0.017     |
| 31         | 0.86    | 8.9601                     | 0.9863 | 1.3305                     | 0.0362 | 33         | 33.9<br>0.006     |
| 32         | 0.82    | 9.5209                     | 0.9858 | 1.6122                     | 0.0141 | 34         | 34.2<br>0.010     |
| 33         | 0.78    | 9.9528                     | 0.9975 | 1.2508                     | 0.0313 | 36         | 34.4<br>0.006     |
| 34         | 0.73    | 11.1090                    | 0.9841 | 2.0449                     | 0.0535 |            |                   |
| 36         | 0.64    | 13.4440                    | 0.9589 | 3.0696                     | 0.0555 |            |                   |
| 38         | 0.54    | 16.7220                    | 0.9361 | 4.4444                     | 0.0736 |            |                   |

<sup>a</sup> Refer to above experimental section for description of measurements; for both measurements concentration of polymer in water =  $1.3 \times 10^{-4}$  M (3.5 mg/mL), based on  $M_n$  26,830 g/mol (<sup>1</sup>H NMR estimate); refer to figures below for plotted results

<sup>b</sup>  $A_0$  refers to measured absorbance intensity at onset of thermal decolouration period.

**Table 4:** Decolouration of [(NIPAM)<sub>178-co</sub>-(SOX)<sub>1.6</sub>]-*b*-[NAM]<sub>93</sub> **4** in water and corresponding DLS measurements (right) *vs* temperature (°C).<sup>a</sup>

| Temp. (°C) | $A_0^b$ | $k_1$ (min <sup>-1</sup> ) | $A_1$  | $k_2$ (min <sup>-1</sup> ) | $A_2$  | Temp. (°C) | $D_h$ (nm)<br>PDI |
|------------|---------|----------------------------|--------|----------------------------|--------|------------|-------------------|
| 20         | 1.87    | 3.7376                     | 0.9746 | 0.6778                     | 0.0390 | 20         | 16.9<br>0.244     |
| 22         | 1.62    | 4.5608                     | 0.9873 | 0.9322                     | 0.0309 | 22         | 17.3<br>0.235     |
| 24         | 1.41    | 5.6587                     | 1.0177 | 0.9602                     | 0.0205 | 24         | 18.2<br>0.227     |
| 26         | 1.24    | 6.7994                     | 0.9929 | 0.71055                    | 0.0171 | 26         | 20.6<br>0.199     |
| 28         | 1.13    | 7.7877                     | 1.0126 | 0.9268                     | 0.0236 | 27         | 24.1<br>0.175     |
| 30         | 1.02    | 8.3080                     | 0.9763 | 1.1316                     | 0.0288 | 28         | 29.0<br>0.130     |
| 31         | 0.97    | 8.6960                     | 0.9692 | 1.2508                     | 0.0331 | 30         | 38.1<br>0.035     |
| 32         | 0.90    | 9.2352                     | 0.9607 | 1.4925                     | 0.0382 | 32         | 39.3<br>0.007     |
| 33         | 0.85    | 9.7262                     | 0.9533 | 2.2974                     | 0.0450 | 33         | 39.5<br>0.017     |
| 34         | 0.79    | 10.401                     | 0.9717 | 1.6842                     | 0.0263 | 36         | 40.0<br>0.016     |
| 36         | 0.72    | 12.536                     | 0.9681 | 2.2300                     | 0.0291 |            |                   |
| 38         | 0.61    | 15.114                     | 0.9738 | 4.6185                     | 0.0281 |            |                   |

<sup>a</sup> Refer to above experimental section for description of measurements; for both measurements concentration of polymer in water =  $1.2 \times 10^{-4}$  M (4.2 mg/ml), based on  $M_n$  34,080 g/mol (<sup>1</sup>H NMR estimate); refer to figures below for plotted results.

<sup>b</sup>  $A_0$  refers to measured absorbance intensity at onset of thermal decolouration period.



**Table 5:** Decolouration kinetics of SOX-(NAM)<sub>84</sub> in water vs temperature (°C).<sup>a</sup>

| Temp. (°C) | A <sub>0</sub> <sup>b</sup> | k <sub>1</sub> (min <sup>-1</sup> ) | A <sub>1</sub> | k <sub>2</sub> (min <sup>-1</sup> ) | A <sub>2</sub> |
|------------|-----------------------------|-------------------------------------|----------------|-------------------------------------|----------------|
| 20         | 1.83                        | 1.4731                              | 1.0144         | 1.4747                              | 0.0192         |
| 22         | 1.68                        | 2.0700                              | 1.0092         | 2.0775                              | 0.0305         |
| 24         | 1.42                        | 2.5766                              | 1.0066         | 2.5826                              | 0.0314         |
| 26         | 1.10                        | 3.3058                              | 1.0068         | 3.3077                              | 0.0194         |
| 28         | 0.98                        | 4.1507                              | 1.0065         | 4.1515                              | 0.0160         |
| 30         | 0.85                        | 5.2334                              | 1.0066         | 5.2422                              | 0.0167         |
| 32         | 0.69                        | 6.5120                              | 1.0084         | 6.5153                              | 0.0159         |
| 34         | 0.58                        | 8.1762                              | 1.0097         | 8.1807                              | 0.0254         |
| 36         | 0.45                        | 10.454                              | 1.0469         | 10.4900                             | 0.0066         |

<sup>a</sup> Refer to above experimental section for description of measurements; for both measurements concentration of polymer in water =  $1.2 \times 10^{-4}$  M (1.6 mg/ml) based on  $M_n$  12,450 g/mol (<sup>1</sup>H NMR estimate); refer to figure below for plotted result.

<sup>b</sup> A<sub>0</sub> refers to measured absorbance intensity at onset of thermal decolouration period.

**Table 6:** Decolouration kinetics of (NAM)<sub>93-co</sub>-(SOX)<sub>1</sub> in water vs temperature (°C).<sup>a</sup>

| Temp. (°C) | A <sub>0</sub> <sup>b</sup> | k <sub>1</sub> (min <sup>-1</sup> ) | A <sub>1</sub> | k <sub>2</sub> (min <sup>-1</sup> ) | A <sub>2</sub> |
|------------|-----------------------------|-------------------------------------|----------------|-------------------------------------|----------------|
| 20         | 0.87                        | 2.1497                              | 0.9074         | 0.6814                              | 0.1140         |
| 22         | 0.53                        | 2.7806                              | 0.8926         | 0.9224                              | 0.1264         |
| 24         | 0.34                        | 3.2975                              | 0.7834         | 1.2658                              | 0.2164         |
| 26         | 0.21                        | 3.8182                              | 0.8807         | 1.0603                              | 0.1124         |
| 28         | 0.14                        | 4.7410                              | 0.8920         | 1.1823                              | 0.1060         |
| 30         | 0.10                        | 6.0363                              | 0.8788         | 1.4281                              | 0.1249         |
| 32         | 0.07                        | 7.0123                              | 0.9076         | 0.5703                              | 0.0832         |
| 34         | 0.05                        | 8.3058                              | 0.9311         | 0.4430                              | 0.0450         |
| 36         | 0.04                        | 9.5338                              | 0.8900         | 0.0298                              | 0.0645         |

<sup>a</sup> Refer to above experimental section for description of measurements; for both measurements concentration of polymer in water =  $1.2 \times 10^{-4}$  M (1.7 mg/mL) based on  $M_n$  13,900 g/mol (<sup>1</sup>H NMR estimate); refer to figure below for plotted result.

<sup>b</sup> A<sub>0</sub> refers to measured absorbance intensity at onset of thermal decolouration period.

**Table 7:** Decolouration kinetics of (NAM)<sub>93-co</sub>-(SOX)<sub>1.1</sub> in water vs temperature (°C).<sup>a</sup>

| Temp. (° C) | $A_0^b$ | $k_1$ (min <sup>-1</sup> ) | $A_1$  | $k_2$ (min <sup>-1</sup> ) | $A_2$  |
|-------------|---------|----------------------------|--------|----------------------------|--------|
| 20          | 1.46    | 2.8557                     | 0.8196 | 0.8771                     | 0.2148 |
| 22          | 1.32    | 3.3313                     | 0.8700 | 0.9638                     | 0.1526 |
| 24          | 1.16    | 3.8843                     | 0.9193 | 1.0501                     | 0.1055 |
| 26          | 0.99    | 4.4479                     | 0.9464 | 1.1063                     | 0.0638 |
| 28          | 0.87    | 5.2538                     | 0.9512 | 1.3277                     | 0.0498 |
| 30          | 0.63    | 6.3473                     | 0.9137 | 2.1566                     | 0.1037 |
| 32          | 0.56    | 7.7496                     | 0.9242 | 2.4552                     | 0.0908 |
| 34          | 0.42    | 8.6566                     | 0.9776 | 1.3673                     | 0.0183 |
| 36          | 0.36    | 10.372                     | 1.0131 | 0.3586                     | 0.0056 |

<sup>a</sup> Refer to above experimental section for description of measurements; for both measurements concentration of polymer in water =  $1.2 \times 10^{-4}$  M (1.6 mg/mL) based on  $M_n$  13,600 g/mol (<sup>1</sup>H NMR estimate); refer to figure below for plotted result.

<sup>b</sup>  $A_0$  refers to measured absorbance intensity at onset of thermal decolouration period

**Table 8:** Capture of SOX-PROP into micelles made from **5** (BA)<sub>93</sub>-*b*-(NAM)<sub>89</sub>.<sup>a</sup>

| [Polymer]<br>(mg/ml) | Polymer<br>(mg) | $D_h$<br>(nm)<br>PDI | $t_{1/2}$<br>(s) | $A_0^d$ | $k_1$ (min <sup>-1</sup> ) | $A_1$  | $k_2$ (min <sup>-1</sup> ) | $A_2$ |
|----------------------|-----------------|----------------------|------------------|---------|----------------------------|--------|----------------------------|-------|
| 0.24                 | 1.1             | -                    | 6.4              | 1.83    | 6.8656                     | 1.0313 | 0                          | 0     |
| 0.61                 | 2.8             | -                    | 5.6              | 1.31    | 7.7933                     | 1.0309 | 0                          | 0     |
| 1.21                 | 5.5             | 52.5<br>(0.225)      | 4.6              | 1.29    | 9.2046                     | 1.0042 | 0                          | 0     |
| 1.95                 | 8.9             | 48.6<br>(0.169)      | 4.3              | 1.32    | 10.4540                    | 1.0491 | 0                          | 0     |
| 4.21                 | 19.2            | 43.3<br>(0.115)      | 3.8              | 1.25    | 11.5640                    | 1.0363 | 0                          | 0     |

**Table 9:** Decolouration kinetics of SOX-(BA)<sub>135</sub>-*b*-(NAM)<sub>104</sub> block copolymer **6** in water vs DLS result.

| [Polymer]<br>(mg/ml) | Polymer<br>(mg) | $D_h$<br>(nm)<br>PDI | $t_{1/2}$<br>(s) | $A_0^b$ | $k_1$ (min <sup>-1</sup> ) | $A_1$  | $k_2$ (min <sup>-1</sup> ) | $A_2$ |
|----------------------|-----------------|----------------------|------------------|---------|----------------------------|--------|----------------------------|-------|
| 4.40                 | 19.8            | 49.9<br>(0.113)      | 4.2              | 1.18    | 10.5420                    | 1.0391 | 0                          | 0     |

<sup>a</sup> Refer to experimental section for full description of procedure

<sup>b</sup>  $A_0$  refers to measured absorbance intensity at onset of thermal decolouration period
